# Supplementary material for: Presumptive Contamination: A New Approach to PFAS Contamination Based on Likely Sources
Source: PubMed Central journal article supplement — Environ Sci Technol Lett. 2022 Oct 12;9(11):983–90. doi: 10.1021/acs.estlett.2c00502 (PMC9648201; doi:10.1021/acs.estlett.2c00502), 2022-10-12
Supplement: ez2c00502_si_001.pdf [file ez2c00502_si_001.pdf]

1 **Presumptive Contamination:**  
2 **A New Approach to PFAS Contamination Based on Likely Sources**

3  
4 ***Supporting Information for Publication***

5  
6 Derrick Salvatore<sup>1</sup>, Kira Mok<sup>2</sup>, Kimberly K. Garrett<sup>2</sup>, Grace Poudrier<sup>2</sup>, Phil Brown<sup>2,3</sup>, Linda  
7 S. Birnbaum<sup>4</sup>, Gretta Goldenman<sup>5</sup>, Mark F. Miller<sup>6</sup>, Sharyle Patton<sup>7</sup>, Maddy Poehlein<sup>8</sup>, Julia  
8 Varshavsky<sup>9</sup>, Alissa Cordner<sup>10</sup> \*

9  
10 **Affiliations:**

11 <sup>1</sup> Department of Marine and Environmental Sciences, Northeastern University; Boston,  
12 MA, 02215, USA.

13 <sup>2</sup> Department of Sociology and Anthropology and Department of Health Sciences,  
14 Northeastern University; Boston, MA, 02215, USA.

15 <sup>3</sup> Department of Health Sciences, Northeastern University; Boston, MA, 02215, USA.

16 <sup>4</sup> National Institute of Environmental Health Sciences; Research Triangle Park, NC,  
17 27709, USA; Duke University; Durham, NC, 27708, USA.

18 <sup>5</sup> Milieu Consulting; Brussels, Belgium.

19 <sup>6</sup> National Institute of Environmental Health Sciences and U.S. Public Health Service;  
20 Research Triangle Park, NC, 27709, USA.

21 <sup>7</sup> Health and Environment Program, Commonweal; Bolinas, CA, 94924, USA.

22 <sup>8</sup> PFAS Project Lab, Northeastern University; Boston, MA, 02215, USA.

23 <sup>9</sup> Department of Health Sciences and Department of Civil and Environmental  
24 Engineering, Northeastern University; Boston, MA, 02215, USA.

25 <sup>10</sup> Department of Sociology, Whitman College; Walla Walla, WA, 99362, USA.

26  
27 \* Corresponding author. Email: cordneaa@whitman.edu; 345 Boyer Ave, Walla Walla,  
28 WA, 99362, USA

29  
30  
31 **Note about references:** Citations 1-73 correspond to references in the main manuscript.

32 Citations 74 and 75 are as follows:

33  
34 (74) *Enforcement and Compliance History Online Facility Search*. U.S. EPA.

35 <https://echo.epa.gov/facilities/>, /facilities/facility-search (accessed 2022-03-03).

36 (75) *NAICS Association*. NAICS Association. <https://www.naics.com/> (accessed 2022-  
37 03-03).

41 **Description of Presumptive Contamination Validation Process:**

42  
43 We used a manual validation process to assess whether known PFAS contamination sites were  
44 fully captured by our conceptual model. The PFAS Project Lab at Northeastern University  
45 maintains a publicly available database of known PFAS contamination sites,<sup>60,61</sup> though as we  
46 discussed in the full paper, known sites severely underrepresent PFAS contamination. To be  
47 conservative in our validation process, our validation process oversampled locations with more  
48 PFAS testing. We expected that these locations would be more likely to uncover atypical sites of  
49 contamination, decreasing our model's predictive accuracy, since a state with no systematic  
50 PFAS testing might only have data on airports or DOD facilities, rather than industrial or waste-  
51 related sites.

52  
53 We selected the five states with the highest numbers of known contamination sites (CA, ME, MI,  
54 NH, and VT) and the five states closest to the median number of known contamination sites  
55 (MN, MS, RI, TN, WA). Within each state, we selected the two counties with the highest  
56 number of known contamination sites and the two counties closest to the median number of  
57 known contamination sites.

58  
59 Using information about known contamination sites in the resulting 40 counties, we searched the  
60 presumptive contamination map and associated CSV file for matching sites.<sup>60</sup> If a matching site  
61 was not readily visible, we compared facility names and searched publicly available information  
62 for updates to business names or historical use data. We calculated three accuracy measurements  
63 in our validation process: the percent of known contamination sites that were observable in the  
64 map of presumptive contamination sites (*observed*); the percent of known contamination sites

65 that were included in our conceptual model but were not included in the map (*expected*); and the  
66 total percent of known contamination sites either in our map or, while not mapped, our  
67 conceptual model (*total*).

68

69 We would not expect 100% of known contamination sites to be included for several reasons.

70 First, our presumptive contamination model is informed by prior research consensus of sites that  
71 are *most likely* to be contaminated, because it is designed to be sufficiently conservative to be  
72 useful in the prioritization of future testing; thus potential contamination sites that are *possible*  
73 but not *probable* are excluded. Second, the source of PFAS contamination is not always known,  
74 so it may be unknown whether PFAS contamination at a certain site is ultimately traceable to one  
75 of our three general categories.

76

**Table S-1. NAICS codes included in presumptive contamination model**

| NAICS code | title                                                                                          | sources    | number of facilities |
|------------|------------------------------------------------------------------------------------------------|------------|----------------------|
| 313320     | Fabric Coating Mills                                                                           | bcdefghik  | 380                  |
| 325510     | Paint and Coating Manufacturing                                                                | abcdefghik | 2100                 |
| 322220     | Paper Bag and Coated and Treated Paper Manufacturing                                           | bcdefghi   | 0                    |
| 313210     | Broadwoven Fabric Mills                                                                        | bcdefhk    | 484                  |
| 322121     | Paper (except Newsprint) Mills                                                                 | bcdefhk    | 610                  |
| 332813     | Electroplating, Plating, Polishing, Anodizing, and Coloring                                    | bcdefhi    | 5642                 |
| 324110     | Petroleum Refineries                                                                           | abcdehk    | 594                  |
| 325612     | Polish and Other Sanitation Good Manufacturing                                                 | abdefhk    | 673                  |
| 334413     | Semiconductor and Related Device Manufacturing                                                 | bcdefi     | 1552                 |
| 326113     | Unlaminated Plastics Film and Sheet (except Packaging) Manufacturing                           | bdefhi     | 597                  |
| 332812     | Metal Coating, Engraving (except Jewelry and Silverware), and Allied Services to Manufacturers | bcefgi     | 3587                 |
| 333318     | Other Commercial and Service Industry Machinery Manufacturing                                  | bdefgh     | 0                    |
| 334419     | Other Electronic Component Manufacturing                                                       | bcdefg     | 1663                 |
| 562212     | Solid Waste Landfill                                                                           | cdefjk     | 4765                 |
| 325199     | All Other Basic Organic Chemical Manufacturing                                                 | abdefi     | 1847                 |
| 323111     | Commercial Printing (except Screen and Books)                                                  | bcdhk      | 4226                 |
| 313110     | Fiber, Yarn, and Thread Mills                                                                  | bcefh      | 0                    |
| 314110     | Carpet and Rug Mills                                                                           | bdhik      | 189                  |
| 316110     | Leather and Hide Tanning and Finishing                                                         | bdefg      | 276                  |
| 325211     | Plastics Material and Resin Manufacturing                                                      | bdgik      | 2141                 |
| 324191     | Petroleum Lubricating Oil and Grease Manufacturing                                             | abcdh      | 919                  |
| 325998     | All Other Miscellaneous Chemical Product and Preparation Manufacturing                         | aefgk      | 2598                 |
| 562211     | Hazardous Waste Treatment and Disposal                                                         | acefj      | 1357                 |
| 562213     | Solid Waste Combustors and Incinerators                                                        | acefj      | 407                  |
| 313310     | Textile and Fabric Finishing Mills                                                             | bcdh       | 0                    |
| 322219     | Other Paperboard Container Manufacturing                                                       | bcdh       | 0                    |
| 323120     | Support Activities for Printing                                                                | bcdh       | 0                    |
| 313220     | Narrow Fabric Mills and Schiffli Machine Embroidery                                            | cefk       | 0                    |
| 313230     | Nonwoven Fabric Mills                                                                          | bchk       | 239                  |
| 322130     | Paperboard Mills                                                                               | cefk       | 258                  |

|        |                                                                          |      |      |
|--------|--------------------------------------------------------------------------|------|------|
| 332999 | All Other Miscellaneous Fabricated Metal Product Manufacturing           | bdgh | 4799 |
| 424690 | Other Chemical and Allied Products Merchant Wholesalers                  | bdhj | 1698 |
| 314910 | Textile Bag and Canvas Mills                                             | befi | 0    |
| 326112 | Plastics Packaging Film and Sheet (including Laminated) Manufacturing    | defi | 350  |
| 335999 | All Other Miscellaneous Electrical Equipment and Component Manufacturing | befg | 877  |
| 562112 | Hazardous Waste Collection                                               | cefj | 2561 |
| 562219 | Other Nonhazardous Waste Treatment and Disposal                          | cefj | 744  |
| 325611 | Soap and Other Detergent Manufacturing                                   | abeh | 1012 |

The use of NAICS codes to identify potential industrial PFAS dischargers has been suggested by several regulatory agencies and academic researchers. This table lists the NAICS codes identified by at least four of the following sources\*:<sup>†, ‡</sup>; a:<sup>52</sup>; b:<sup>36</sup>; c:<sup>17</sup>; d:<sup>37</sup>; e:<sup>38</sup> f:<sup>35</sup> g:<sup>39</sup>; h:<sup>40</sup>; i:<sup>41</sup>; j:<sup>42</sup>; k:<sup>43</sup>.

\* We removed NAICS code 488119 (Other Airport Operations) because AFFF-certified airports are included in the *Major Airports (FAA Part 139)* dataset, to avoid double-counting these facilities.

† NAICS codes 322220, 333318, 313110, 313310, 322219, 323120, 313220, and 314910 returned no facility results in the FRS EZ Query. The EPA’s Enforcement and Compliance History Online (ECHO) database is another tool to download facilities from NAICS codes, but it does not include a location accuracy. The ECHO database returned 2,109 facilities from these seven NAICS codes.<sup>74</sup>

‡ The Massachusetts Science Advisory Board identified some facilities by Standard Industrial Classification (SIC) codes, which were converted to NAICS using a SIC to NAICS crosswalk.<sup>75</sup>

77  
78

**Table S-2. Presumptive contamination model validation, county level analysis**

| State         | County          | County known contamination <sup>a</sup> | Known contamination sites, n | Observed matches <sup>b</sup> , n | Expected matches (not observed) <sup>c</sup> , n | Total expected matches <sup>d</sup> , n (%) |
|---------------|-----------------|-----------------------------------------|------------------------------|-----------------------------------|--------------------------------------------------|---------------------------------------------|
| California    | Los Angeles     | High                                    | 29                           | 25                                | 2                                                | 27 (93%)                                    |
| California    | San Diego       | High                                    | 23                           | 14                                | 9                                                | 23 (100%)                                   |
| California    | San Luis Obispo | Median                                  | 4                            | 4                                 | 0                                                | 4 (100%)                                    |
| California    | Tulare          | Median                                  | 4                            | 2                                 | 2                                                | 4 (100%)                                    |
| Maine         | Cumberland      | High                                    | 16                           | 6                                 | 5                                                | 11 (69%)                                    |
| Maine         | Kennebec        | High                                    | 12                           | 3                                 | 6                                                | 9 (75%)                                     |
| Maine         | Washington      | Median                                  | 5                            | 1                                 | 4                                                | 5 (100)                                     |
| Maine         | Waldo           | Median                                  | 6                            | 1                                 | 3                                                | 4 (67%)                                     |
| Michigan      | Wayne           | High                                    | 38                           | 18                                | 15                                               | 33 (87%)                                    |
| Michigan      | Oakland         | High                                    | 19                           | 12                                | 7                                                | 19 (100%)                                   |
| Michigan      | Cass            | Median                                  | 1                            | 0                                 | 1                                                | 1 (100%)                                    |
| Michigan      | Lapeer          | Median                                  | 1                            | 0                                 | 1                                                | 1 (100%)                                    |
| Minnesota     | St. Louis       | High                                    | 10                           | 6                                 | 4                                                | 10 (100%)                                   |
| Minnesota     | Washington      | High                                    | 7                            | 3                                 | 2                                                | 5 (71%)                                     |
| Minnesota     | Koochiching     | Median                                  | 1                            | 1                                 | 0                                                | 1 (100%)                                    |
| Minnesota     | Meeker          | Median                                  | 1                            | 1                                 | 0                                                | 1 (100%)                                    |
| Mississippi   | Harrison        | High                                    | 3                            | 3                                 | 0                                                | 3 (100%)                                    |
| Mississippi   | Lauderdale      | High                                    | 2                            | 2                                 | 0                                                | 2 (100%)                                    |
| Mississippi   | Forrest         | Median                                  | 1                            | 1                                 | 0                                                | 1 (100%)                                    |
| Mississippi   | Lowndes         | Median                                  | 1                            | 1                                 | 0                                                | 1 (100%)                                    |
| New Hampshire | Rockingham      | High                                    | 105                          | 11                                | 39                                               | 50 (48%)                                    |
| New Hampshire | Hillsborough    | High                                    | 84                           | 19                                | 30                                               | 49 (58%)                                    |
| New Hampshire | Grafton         | Median                                  | 40                           | 7                                 | 19                                               | 26 (65%)                                    |
| New Hampshire | Cheshire        | Median                                  | 36                           | 7                                 | 13                                               | 20 (56%)                                    |
| Rhode Island  | Providence      | High                                    | 3                            | 1                                 | 2                                                | 3 (100%)                                    |
| Rhode Island  | Kent            | High                                    | 2                            | 0                                 | 1                                                | 1 (50%)                                     |
| Rhode Island  | Washington      | Median                                  | 2                            | 2                                 | 0                                                | 2 (100%)                                    |
| Rhode Island  | Newport         | Median                                  | 1                            | 0                                 | 1                                                | 1 (100%)                                    |
| Tennessee     | Shelby          | High                                    | 2                            | 2                                 | 0                                                | 2 (100%)                                    |
| Tennessee     | Davidson        | High                                    | 1                            | 1                                 | 0                                                | 1 (100%)                                    |
| Tennessee     | Blount          | Median                                  | 1                            | 1                                 | 0                                                | 1 (100%)                                    |
| Tennessee     | Coffee          | Median                                  | 1                            | 1                                 | 0                                                | 1 (100%)                                    |
| Vermont       | Chittenden      | High                                    | 13                           | 8                                 | 5                                                | 13 (100%)                                   |
| Vermont       | Bennington      | High                                    | 17                           | 7                                 | 10                                               | 17 (100%)                                   |
| Vermont       | Rutland         | Median                                  | 3                            | 2                                 | 1                                                | 3 (100%)                                    |
| Vermont       | Windsor         | Median                                  | 4                            | 0                                 | 4                                                | 4 (100%)                                    |
| Washington    | Pierce          | High                                    | 1                            | 1                                 | 0                                                | 1 (100%)                                    |
| Washington    | Spokane         | High                                    | 1                            | 1                                 | 0                                                | 1 (100%)                                    |
| Washington    | King            | Median                                  | 1                            | 0                                 | 1                                                | 1 (100%)                                    |
| Washington    | Kitsap          | Median                                  | 1                            | 1                                 | 0                                                | 1 (100%)                                    |
| <b>Total</b>  |                 |                                         | <b>503</b>                   | <b>176</b>                        | <b>187</b>                                       | <b>363 (72%)</b>                            |

**Notes:** <sup>a</sup>State-based designation of counties with highest and median numbers of known contamination sites

<sup>b</sup>Number of presumptive contamination sites with matched known contamination sites within the county

<sup>c</sup>Number of known contamination sites without presumptive contamination matches but are included in model

<sup>d</sup>Total known contamination sites incorporated by model (observed matches + expected matches)

**Source:** Author's analysis<sup>60,61</sup>

**Table S-3. Presumptive model validation, state comparison by known contamination level**

| States with Highest Number of Known Contamination Sites |                 |                              |                                       |                                                  |                                             | States with Median Number of Known Contamination Sites |             |                              |                                       |                                                  |                                             |
|---------------------------------------------------------|-----------------|------------------------------|---------------------------------------|--------------------------------------------------|---------------------------------------------|--------------------------------------------------------|-------------|------------------------------|---------------------------------------|--------------------------------------------------|---------------------------------------------|
| State                                                   | County          | Known contamination sites, n | Observed matches <sup>a</sup> , n (%) | Expected matches (not observed) <sup>b</sup> , n | Total expected matches <sup>c</sup> , n (%) | State                                                  | County      | Known contamination sites, n | Observed matches <sup>a</sup> , n (%) | Expected matches (not observed) <sup>b</sup> , n | Total expected matches <sup>c</sup> , n (%) |
| CA                                                      | Los Angeles     | 29                           | 25 (86%)                              | 2                                                | 27 (93%)                                    | MN                                                     | St. Louis   | 10                           | 6 (60%)                               | 4                                                | 10 (100%)                                   |
| CA                                                      | San Diego       | 23                           | 14 (61%)                              | 9                                                | 23 (100%)                                   | MN                                                     | Washington  | 7                            | 3 (43%)                               | 2                                                | 5 (71%)                                     |
| CA                                                      | San Luis Obispo | 4                            | 4 (100%)                              | 0                                                | 4 (100%)                                    | MN                                                     | Koochiching | 1                            | 1 (100%)                              | 0                                                | 1 (100%)                                    |
| CA                                                      | Tulare          | 4                            | 2 (50%)                               | 2                                                | 4 (100%)                                    | MS                                                     | Meeker      | 1                            | 1 (100%)                              | 0                                                | 1 (100%)                                    |
| ME                                                      | Cumberland      | 16                           | 6 (38%)                               | 5                                                | 11 (69%)                                    | MS                                                     | Harrison    | 3                            | 3 (100%)                              | 0                                                | 3 (100%)                                    |
| ME                                                      | Kennebec        | 12                           | 3 (25%)                               | 6                                                | 9 (75%)                                     | MS                                                     | Lauderdale  | 2                            | 2 (100%)                              | 0                                                | 2 (100%)                                    |
| ME                                                      | Washington      | 5                            | 1 (20%)                               | 4                                                | 5 (100%)                                    | MS                                                     | Forrest     | 1                            | 1 (100%)                              | 0                                                | 1 (100%)                                    |
| ME                                                      | Waldo           | 6                            | 1 (17%)                               | 3                                                | 4 (67%)                                     | MS                                                     | Lowndes     | 1                            | 1 (100%)                              | 0                                                | 1 (100%)                                    |
| MI                                                      | Wayne           | 38                           | 18 (47%)                              | 15                                               | 33 (87%)                                    | RI                                                     | Providence  | 3                            | 1 (33%)                               | 2                                                | 3 (100%)                                    |
| MI                                                      | Oakland         | 19                           | 12 (63%)                              | 7                                                | 19 (100%)                                   | RI                                                     | Kent        | 2                            | 0 (0%)                                | 1                                                | 1 (50%)                                     |
| MI                                                      | Cass            | 1                            | 0 (0%)                                | 1                                                | 1 (100%)                                    | RI                                                     | Washington  | 2                            | 2 (100%)                              | 0                                                | 2 (100%)                                    |
| MI                                                      | Lapeer          | 1                            | 0 (0%)                                | 1                                                | 1 (100%)                                    | RI                                                     | Newport     | 1                            | 0 (0%)                                | 1                                                | 1 (100%)                                    |
| NH                                                      | Rockingham      | 105                          | 11 (10%)                              | 39                                               | 50 (48%)                                    | TN                                                     | Shelby      | 2                            | 2 (100%)                              | 0                                                | 2 (100%)                                    |
| NH                                                      | Hillsborough    | 84                           | 19 (23%)                              | 30                                               | 49 (58%)                                    | TN                                                     | Davidson    | 1                            | 1 (100%)                              | 0                                                | 1 (100%)                                    |
| NH                                                      | Grafton         | 40                           | 7 (18%)                               | 19                                               | 26 (65%)                                    | TN                                                     | Blount      | 1                            | 1 (100%)                              | 0                                                | 1 (100%)                                    |
| NH                                                      | Cheshire        | 36                           | 7 (19%)                               | 13                                               | 20 (56%)                                    | TN                                                     | Coffee      | 1                            | 1 (100%)                              | 0                                                | 1 (100%)                                    |
| VT                                                      | Chittenden      | 13                           | 8 (62%)                               | 5                                                | 13 (100%)                                   | WA                                                     | Pierce      | 1                            | 1 (100%)                              | 0                                                | 1 (100%)                                    |
| VT                                                      | Bennington      | 17                           | 7 (41%)                               | 10                                               | 17 (100%)                                   | WA                                                     | Spokane     | 1                            | 1 (100%)                              | 0                                                | 1 (100%)                                    |
| VT                                                      | Rutland         | 3                            | 2 (67%)                               | 1                                                | 3 (100%)                                    | WA                                                     | King        | 1                            | 0 (0%)                                | 1                                                | 1 (100%)                                    |
| VT                                                      | Windsor         | 4                            | 0 (0%)                                | 4                                                | 4 (100%)                                    | WA                                                     | Kitsap      | 1                            | 1 (100%)                              | 0                                                | 1 (100%)                                    |
| <b>Total</b>                                            |                 | <b>460</b>                   | <b>147 (32%)</b>                      | <b>176</b>                                       | <b>323 (70%)</b>                            |                                                        |             | <b>43</b>                    | <b>29 (67%)</b>                       | <b>11</b>                                        | <b>40 (93%)</b>                             |

**Notes:** <sup>a</sup>Number of presumptive contamination sites with matched known contamination sites within the county

<sup>b</sup>Number of known contamination sites without presumptive contamination matches but are included in model

<sup>c</sup>Total known contamination sites incorporated by model (observed matches + expected matches)

**Source:** Author's analysis<sup>60,61</sup>

**Table S-4. Presumptive model validation, county comparison by known contamination level**

|              |              | Counties with Highest Number of Known Contamination Sites |                                       |                                                  |                                             | Counties with Median Number of Known Contamination Sites |                              |                                       |                                                  |                                             |
|--------------|--------------|-----------------------------------------------------------|---------------------------------------|--------------------------------------------------|---------------------------------------------|----------------------------------------------------------|------------------------------|---------------------------------------|--------------------------------------------------|---------------------------------------------|
| State        | County       | Known contamination sites, n                              | Observed matches <sup>a</sup> , n (%) | Expected matches (not observed) <sup>b</sup> , n | Total expected matches <sup>c</sup> , n (%) | County                                                   | Known contamination sites, n | Observed matches <sup>a</sup> , n (%) | Expected matches (not observed) <sup>b</sup> , n | Total expected matches <sup>c</sup> , n (%) |
| CA           | Los Angeles  | 29                                                        | 25 (86%)                              | 2                                                | 27 (93%)                                    | San Luis Obispo                                          | 4                            | 4 (100%)                              | 0                                                | 4 (100%)                                    |
| CA           | San Diego    | 23                                                        | 14 (61%)                              | 9                                                | 23 (100%)                                   | Tulare                                                   | 4                            | 2 (50%)                               | 2                                                | 4 (100%)                                    |
| ME           | Cumberland   | 16                                                        | 6 (38%)                               | 5                                                | 11 (69%)                                    | Washington                                               | 5                            | 1 (20%)                               | 4                                                | 5 (100%)                                    |
| ME           | Kennebec     | 12                                                        | 3 (25%)                               | 6                                                | 9 (75%)                                     | Waldo                                                    | 6                            | 1 (17%)                               | 3                                                | 4 (67%)                                     |
| MI           | Wayne        | 38                                                        | 18 (47%)                              | 15                                               | 33 (87%)                                    | Cass                                                     | 1                            | 0 (0%)                                | 1                                                | 1 (100%)                                    |
| MI           | Oakland      | 19                                                        | 12 (63%)                              | 7                                                | 19 (100%)                                   | Lapeer                                                   | 1                            | 0 (0%)                                | 1                                                | 1 (100%)                                    |
| MN           | St. Louis    | 10                                                        | 6 (60%)                               | 4                                                | 10 (100%)                                   | Koochiching                                              | 1                            | 1 (100%)                              | 0                                                | 1 (100%)                                    |
| MN           | Washington   | 7                                                         | 3 (43%)                               | 2                                                | 5 (71%)                                     | Meeker                                                   | 1                            | 1 (100%)                              | 0                                                | 1 (100%)                                    |
| MS           | Harrison     | 3                                                         | 3 (100%)                              | 0                                                | 3 (100%)                                    | Forrest                                                  | 1                            | 1 (100%)                              | 0                                                | 1 (100%)                                    |
| MS           | Lauderdale   | 2                                                         | 2 (100%)                              | 0                                                | 2 (100%)                                    | Lowndes                                                  | 1                            | 1 (100%)                              | 0                                                | 1 (100%)                                    |
| NH           | Rockingham   | 105                                                       | 11 (10%)                              | 39                                               | 50 (48%)                                    | Grafton                                                  | 40                           | 7 (18%)                               | 19                                               | 26 (65%)                                    |
| NH           | Hillsborough | 84                                                        | 19 (23%)                              | 30                                               | 49 (58%)                                    | Cheshire                                                 | 36                           | 7 (19%)                               | 13                                               | 20 (56%)                                    |
| RI           | Providence   | 3                                                         | 1 (33%)                               | 2                                                | 3 (100%)                                    | Washington                                               | 2                            | 2 (100%)                              | 0                                                | 2 (100%)                                    |
| RI           | Kent         | 2                                                         | 0 (0%)                                | 1                                                | 1 (50%)                                     | Newport                                                  | 1                            | 0 (0%)                                | 1                                                | 1 (100%)                                    |
| TN           | Shelby       | 2                                                         | 2 (100%)                              | 0                                                | 2 (100%)                                    | Blount                                                   | 1                            | 1 (100%)                              | 0                                                | 1 (100%)                                    |
| TN           | Davidson     | 1                                                         | 1 (100%)                              | 0                                                | 1 (100%)                                    | Coffee                                                   | 1                            | 1 (100%)                              | 0                                                | 1 (100%)                                    |
| VT           | Chittenden   | 13                                                        | 8 (62%)                               | 5                                                | 13 (100%)                                   | Rutland                                                  | 3                            | 2 (67%)                               | 1                                                | 3 (100%)                                    |
| VT           | Bennington   | 17                                                        | 7 (41%)                               | 10                                               | 17 (100%)                                   | Windsor                                                  | 4                            | 0 (0%)                                | 4                                                | 4 (100%)                                    |
| WA           | Pierce       | 1                                                         | 1 (100%)                              | 0                                                | 1 (100%)                                    | King                                                     | 1                            | 0 (0%)                                | 1                                                | 1 (100%)                                    |
| WA           | Spokane      | 1                                                         | 1 (100%)                              | 0                                                | 1 (100%)                                    | Kitsap                                                   | 1                            | 1 (100%)                              | 0                                                | 1 (100%)                                    |
| <b>Total</b> |              | <b>388</b>                                                | <b>143 (37%)</b>                      | <b>137</b>                                       | <b>280 (72%)</b>                            |                                                          | <b>115</b>                   | <b>33 (29%)</b>                       | <b>50</b>                                        | <b>83 (72%)</b>                             |

**Notes:** <sup>a</sup>Number of presumptive contamination sites with matched known contamination sites within the county

<sup>b</sup>Number of known contamination sites without presumptive contamination matches but are included in model

<sup>c</sup>Total known contamination sites incorporated by model (observed matches + expected matches)

**Source:** Author's analysis<sup>60,61</sup>



**Model Validation discussion:** New Hampshire's robust PFAS testing has identified 469 known contamination sites, while our model identifies only 380 presumptive sites. Excluding New Hampshire's known sites from our validation process increases our model's total accuracy to 83% (Table S-5). New Hampshire sites with PFAS detections not captured by our model include many types of facilities not generally associated with PFAS contamination, such as retail establishments, country clubs, pizza parlors, and convenience stores.

**Table S-5. Presumptive contamination model validation, county level analysis, excluding New Hampshire**

| State        | County          | County known contamination <sup>a</sup> | Known contamination sites, n | Observed matches <sup>b</sup> , n | Expected matches (not observed) <sup>c</sup> , n | Total expected matches <sup>d</sup> , n (%) |
|--------------|-----------------|-----------------------------------------|------------------------------|-----------------------------------|--------------------------------------------------|---------------------------------------------|
| California   | Los Angeles     | High                                    | 29                           | 25                                | 2                                                | 27 (93%)                                    |
| California   | San Diego       | High                                    | 23                           | 14                                | 9                                                | 23 (100%)                                   |
| California   | San Luis Obispo | Median                                  | 4                            | 4                                 | 0                                                | 4 (100%)                                    |
| California   | Tulare          | Median                                  | 4                            | 2                                 | 2                                                | 4 (100%)                                    |
| Maine        | Cumberland      | High                                    | 16                           | 6                                 | 5                                                | 11 (69%)                                    |
| Maine        | Kennebec        | High                                    | 12                           | 3                                 | 6                                                | 9 (75%)                                     |
| Maine        | Washington      | Median                                  | 5                            | 1                                 | 4                                                | 5 (100%)                                    |
| Maine        | Waldo           | Median                                  | 6                            | 1                                 | 3                                                | 4 (67%)                                     |
| Michigan     | Wayne           | High                                    | 38                           | 18                                | 15                                               | 33 (87%)                                    |
| Michigan     | Oakland         | High                                    | 19                           | 12                                | 7                                                | 19 (100%)                                   |
| Michigan     | Cass            | Median                                  | 1                            | 0                                 | 1                                                | 1 (100%)                                    |
| Michigan     | Lapeer          | Median                                  | 1                            | 0                                 | 1                                                | 1 (100%)                                    |
| Minnesota    | St. Louis       | High                                    | 10                           | 6                                 | 4                                                | 10 (100%)                                   |
| Minnesota    | Washington      | High                                    | 7                            | 3                                 | 2                                                | 5 (71%)                                     |
| Minnesota    | Koochiching     | Median                                  | 1                            | 1                                 | 0                                                | 1 (100%)                                    |
| Minnesota    | Meeker          | Median                                  | 1                            | 1                                 | 0                                                | 1 (100%)                                    |
| Mississippi  | Harrison        | High                                    | 3                            | 3                                 | 0                                                | 3 (100%)                                    |
| Mississippi  | Lauderdale      | High                                    | 2                            | 2                                 | 0                                                | 2 (100%)                                    |
| Mississippi  | Forrest         | Median                                  | 1                            | 1                                 | 0                                                | 1 (100%)                                    |
| Mississippi  | Lowndes         | Median                                  | 1                            | 1                                 | 0                                                | 1 (100%)                                    |
| Rhode Island | Providence      | High                                    | 3                            | 1                                 | 2                                                | 3 (100%)                                    |
| Rhode Island | Kent            | High                                    | 2                            | 0                                 | 1                                                | 1 (50%)                                     |
| Rhode Island | Washington      | Median                                  | 2                            | 2                                 | 0                                                | 2 (100%)                                    |
| Rhode Island | Newport         | Median                                  | 1                            | 0                                 | 1                                                | 1 (100%)                                    |
| Tennessee    | Shelby          | High                                    | 2                            | 2                                 | 0                                                | 2 (100%)                                    |
| Tennessee    | Davidson        | High                                    | 1                            | 1                                 | 0                                                | 1 (100%)                                    |
| Tennessee    | Blount          | Median                                  | 1                            | 1                                 | 0                                                | 1 (100%)                                    |
| Tennessee    | Coffee          | Median                                  | 1                            | 1                                 | 0                                                | 1 (100%)                                    |
| Vermont      | Chittenden      | High                                    | 13                           | 8                                 | 5                                                | 13 (100%)                                   |
| Vermont      | Bennington      | High                                    | 17                           | 7                                 | 10                                               | 17 (100%)                                   |
| Vermont      | Rutland         | Median                                  | 3                            | 2                                 | 1                                                | 3 (100%)                                    |
| Vermont      | Windsor         | Median                                  | 4                            | 0                                 | 4                                                | 4 (100%)                                    |
| Washington   | Pierce          | High                                    | 1                            | 1                                 | 0                                                | 1 (100%)                                    |
| Washington   | Spokane         | High                                    | 1                            | 1                                 | 0                                                | 1 (100%)                                    |
| Washington   | King            | Median                                  | 1                            | 0                                 | 1                                                | 1 (100%)                                    |
| Washington   | Kitsap          | Median                                  | 1                            | 1                                 | 0                                                | 1 (100%)                                    |
| <b>Total</b> |                 |                                         | <b>238</b>                   | <b>132</b>                        | <b>86</b>                                        | <b>218 (92%)</b>                            |

**Notes:** <sup>a</sup>State-based designation of counties with highest and median numbers of known contamination sites

<sup>b</sup>Number of presumptive contamination sites with matched known contamination sites within the county

<sup>c</sup>Number of known contamination sites without presumptive contamination matches but are included in model

<sup>d</sup>Total known contamination sites incorporated by model (observed matches + expected matches)

**Source:** Author's analysis <sup>60,61</sup>

**Table S-6. Presumptive contamination model validation – known contamination data<sup>61</sup>**

| State | County      | Site name                                                                                         | Source   | Observed match, presumptive site name(s)                                | Expected match, Type |
|-------|-------------|---------------------------------------------------------------------------------------------------|----------|-------------------------------------------------------------------------|----------------------|
| CA    | Los Angeles | Air Force Plant 42                                                                                | Military | Yes, Air Force Plant 42                                                 |                      |
| CA    | Los Angeles | Antelope Valley Public Landfill                                                                   | Landfill | Yes, Antelope Valley Recycling and Disposal Facility                    |                      |
| CA    | Los Angeles | Azusa Land Reclamation Landfill                                                                   | Landfill | Yes, Azusa Land Reclamation                                             |                      |
| CA    | Los Angeles | Bishop's Canyon Landfill                                                                          | Landfill | Yes, Bishops Canyon Landfill                                            |                      |
| CA    | Los Angeles | Bkk Class III Landfill                                                                            | Landfill | Yes, BKK Corp (EIS use)                                                 |                      |
| CA    | Los Angeles | Bob Hope                                                                                          | Airport  | Yes, Bob Hope                                                           |                      |
| CA    | Los Angeles | Bradley Landfill & Recycling                                                                      | Landfill | Yes, Waste Management Bradley Landfill- Gas Recovery Facility           |                      |
| CA    | Los Angeles | Brothers Plating                                                                                  | Industry | Yes, Brothers plating                                                   |                      |
| CA    | Los Angeles | Burbank Landfill                                                                                  | Landfill | Yes, Burbank City of, Public Works Department                           |                      |
| CA    | Los Angeles | Calabasas Landfill                                                                                | Landfill | Yes, Calabasas Sanitary Landfill, LA County Sanitation Dist (Calabasas) |                      |
| CA    | Los Angeles | Chiquita Canyon Landfill                                                                          | Landfill | No                                                                      | Yes, Landfill        |
| CA    | Los Angeles | DFSP San Pedro                                                                                    | Military | Yes, San Pedro Fuel Depot                                               |                      |
| CA    | Los Angeles | Downey Industrial Center                                                                          | Industry | Yes, McGean-Rohco Inc                                                   |                      |
| CA    | Los Angeles | Edward C. Little Water Reclamation Plant - West Coast Basin Barrier Project - Expansion Phase III | WWTP     | Yes, West Basin Water Recycling Facility                                |                      |
| CA    | Los Angeles | Hewitt Landfill                                                                                   | Landfill | Yes, Hewitt Landfill                                                    |                      |
| CA    | Los Angeles | Hudson Element La                                                                                 | Industry | No                                                                      | No                   |
| CA    | Los Angeles | Lancaster Class III Landfill &                                                                    | Landfill | Yes, Lancaster Landfill and Recycling Center                            |                      |

|    |             |                                                                |          |                                              |               |
|----|-------------|----------------------------------------------------------------|----------|----------------------------------------------|---------------|
|    |             | Recycling Center                                               |          |                                              |               |
| CA | Los Angeles | Long Beach                                                     | Airport  | Yes, Long beach, Daugherty Fld               |               |
| CA | Los Angeles | Lopez Canyon Landfill                                          | Landfill | Yes, Lopez Canyon Landfill                   |               |
| CA | Los Angeles | Los Angeles International Airport                              | Airport  | Yes, Los Angeles INTL                        |               |
| CA | Los Angeles | Los Angeles World Airports - National Car Rental (Former Avis) | Airport  | Yes, Los Angeles AFS Annex No.1              |               |
| CA | Los Angeles | Penrose Landfill                                               | Landfill | No                                           | Yes, Landfill |
| CA | Los Angeles | Peter Pitchess Landfill                                        | Landfill | Yes, Pitchess Honor Rancho Landfill          |               |
| CA | Los Angeles | Pollock Remediation Project                                    | Unknown  | No                                           | No            |
| CA | Los Angeles | Puente Hills Landfill                                          | Landfill | Yes, Puente Hills Landfill                   |               |
| CA | Los Angeles | Scholl Canyon Landfill                                         | Landfill | Yes, LA County Sanitation Dist Scholl Canyon |               |
| CA | Los Angeles | Spadra Landfill                                                | Landfill | Yes, LA County Sanitation Districts (Spadra) |               |
| CA | Los Angeles | Sunshine Canyon Landfill                                       | Landfill | Yes, Sunshine Canyon Landfill                |               |
| CA | Los Angeles | Tujunga Remediation Project                                    | WWTP     | Yes, Tujunga Pit Landfill                    |               |
| CA | San Diego   | Balboa Park Landfill                                           | Landfill | Yes, SD City of Arizona St Landfill          |               |
| CA | San Diego   | Bonsall Landfill                                               | Landfill | No                                           | Yes, Landfill |
| CA | San Diego   | Bradley Park - Old Linda Vista Landfill                        | Landfill | No                                           | Yes, Landfill |
| CA | San Diego   | Duck Pond Landfill                                             | Landfill | Yes, CV Ventures LLC                         |               |
| CA | San Diego   | Encinitas II Landfill                                          | Landfill | Yes, SD CO of Pub Wks Encinitas II Landfill  |               |
| CA | San Diego   | Gillespie Landfill                                             | Landfill | No                                           | Yes, Landfill |

|    |                 |                                          |          |                                            |               |
|----|-----------------|------------------------------------------|----------|--------------------------------------------|---------------|
| CA | San Diego       | Jamacha Sanitary Landfill                | Landfill | No                                         | Yes, Landfill |
| CA | San Diego       | Marine Corps Base Camp Pendleton (South) | Military | Yes, Marine Corps Base Camp Pendleton      |               |
| CA | San Diego       | Maxson Street Landfill                   | Landfill | No                                         | Yes, Landfill |
| CA | San Diego       | Mission Bay Landfill                     | Landfill | Yes, Clean Harbors Environmental LLC       |               |
| CA | San Diego       | Naval Air Station North Island           | Military | Yes, Naval Air Station                     |               |
| CA | San Diego       | North Miramar Landfill                   | Landfill | Yes, North Miramar Landfill                |               |
| CA | San Diego       | Otay Class 1 Landfill                    | Landfill | Yes, Otay Landfill                         |               |
| CA | San Diego       | Palomar Airport Landfill                 | Landfill | Yes, Mc Clellan-Palomar                    |               |
| CA | San Diego       | Paradise Hills Park Landfill             | Landfill | Yes, SD CO of Pub Wks Solid Waste Division |               |
| CA | San Diego       | Poway Landfill                           | Landfill | Yes, SD CO of Pub Wks Poway Landfill       |               |
| CA | San Diego       | Ramona Sanitary Landfill                 | Landfill | Yes, Ramona Landfill                       |               |
| CA | San Diego       | San Diego International Airport          | Airport  | Yes, San Diego Intl                        |               |
| CA | San Diego       | San Marcos II Sanitary Landfill          | Landfill | No                                         | Yes, Landfill |
| CA | San Diego       | South Chollas Landfill                   | Landfill | Yes, SD City of SO Chollas Landfill        |               |
| CA | San Diego       | Sycamore Canyon Landfill                 | Landfill | No                                         | Yes, Landfill |
| CA | San Diego       | Valley Center Landfill                   | Landfill | No                                         | Yes, Landfill |
| CA | San Diego       | Viejas Sanitary Landfill                 | Landfill | No                                         | Yes, Landfill |
| CA | San Luis Obispo | Chicago Grade Landfill Solid Waste       | Landfill | Yes, Chicago Grande Landfill               |               |

|    |                 | Disposal Service                             |                |                                                                                 |                                             |
|----|-----------------|----------------------------------------------|----------------|---------------------------------------------------------------------------------|---------------------------------------------|
| CA | San Luis Obispo | Cold Canyon Landfill Inc.                    | Landfill       | Yes, Cold Canyon Landfill Solid waste Ds, Dye Property/Old Cold Canyon Landfill |                                             |
| CA | San Luis Obispo | Paso Robles Solid Waste Site                 | Landfill       | Yes, City of El Paso de Robles Landfill                                         |                                             |
| CA | San Luis Obispo | San Luis County Regional Airport             | Airport        | Yes, San Luis County Rgnl                                                       |                                             |
| CA | Tulare          | Balance Rock Solid Waste Disposal Service    | Landfill       | No                                                                              | Yes, Landfill                               |
| CA | Tulare          | Kennedy Meadows Solid Waste Disposal Service | Landfill       | No                                                                              | Yes, Landfill                               |
| CA | Tulare          | Teapot Dome Solid Waste Disposal Service     | Landfill       | Yes, Teapot Dome Landfill                                                       |                                             |
| CA | Tulare          | Visalia Solid Waste Disposal Service         | Landfill       | Yes, Visalina Landfill                                                          |                                             |
| ME | Cumberland      | Brunswick Naval Air Station                  | Military       | Yes, Nas Brunswick Me                                                           |                                             |
| ME | Cumberland      | Defense Fuel Supply PT                       | Military       | No                                                                              | Yes, Military                               |
| ME | Cumberland      | Dyer Excavation and Septic                   | Waste          | No                                                                              | No                                          |
| ME | Cumberland      | East End Wastewater Treatment Facility       | WWTP           | Yes, Portland WD W T P                                                          |                                             |
| ME | Cumberland      | Falmouth Wastewater Treatment Facility       | WWTP           | Yes, Falmouth WWTF                                                              |                                             |
| ME | Cumberland      | Freeport Municipal Landfill                  | Landfill       | No                                                                              | Yes, Landfill                               |
| ME | Cumberland      | Keddy Mill                                   | Superfund Site | No                                                                              | Yes, Fabricated Metal Product Manufacturing |

|    |            |                                           |                |                                               |                                   |
|----|------------|-------------------------------------------|----------------|-----------------------------------------------|-----------------------------------|
| ME | Cumberland | Maine Metal Finishing & Lagoons           | Industry       | No                                            | Yes, Industrial - Metal Finishing |
| ME | Cumberland | McKin Co.                                 | Superfund Site | No                                            | No                                |
| ME | Cumberland | New Gloucester Town Garage                | Unknown        | No                                            | No                                |
| ME | Cumberland | Sanford Municipal Landfill                | Landfill       | No                                            | Yes, Landfill                     |
| ME | Cumberland | South Portland Wastewater Treatment Plant | WWTP           | Yes, South Portland STP                       |                                   |
| ME | Cumberland | Walnut Hill Road                          | Unknown        | No                                            | No                                |
| ME | Cumberland | Westbrook Wastewater Treatment Plant      | WWTP           | Yes, Westbrook WWTF                           |                                   |
| ME | Cumberland | Wolf Neck Farm                            | Unknown        | No                                            | No                                |
| ME | Cumberland | Yarmouth Sludge Compost Site              | Waste          | Yes, Yarmouth WW T P                          |                                   |
| ME | Kennebec   | Augusta Tissue LLC Sludge Landfill        | Landfill       | Yes, Hatch Hill Solid Waste Disposal Facility |                                   |
| ME | Kennebec   | Gardiner Wastewater Treatment Plant       | WWTP           | Yes, Gardiner WPAF                            |                                   |
| ME | Kennebec   | Hawk Ridge Farm                           | Waste          | No                                            | No                                |
| ME | Kennebec   | Oakland Landfill                          | Landfill       | No                                            | Yes, Landfill                     |
| ME | Kennebec   | Pat Jackson Septic Compost Facility       | WWTP           | No                                            | No                                |
| ME | Kennebec   | Route 17 Truck Accident                   | Unknown        | No                                            | Yes, AFFF Release                 |
| ME | Kennebec   | Textech Industry                          | Industry       | Yes, Tex Tech Industries Incorporated         |                                   |
| ME | Kennebec   | Truck Accident - Belgrade                 | Unknown        | No                                            | Yes, AFFF Release                 |
| ME | Kennebec   | Vassalboro Landfill                       | Landfill       | No                                            | Yes, Landfill                     |

|    |            |                                       |          |                                     |                   |
|----|------------|---------------------------------------|----------|-------------------------------------|-------------------|
| ME | Kennebec   | Vassalboro Sand Salt Storage Bld      | Industry | No                                  | No                |
| ME | Kennebec   | Waterville Landfill                   | Landfill | No                                  | Yes, Landfill     |
| ME | Kennebec   | Winthrop Landfill                     | Landfill | No                                  | Yes, Landfill     |
| ME | Waldo      | Belfast Landfill                      | Landfill | No                                  | Yes, Landfill     |
| ME | Waldo      | Belfast Wastewater Treatment Facility | WWTP     | Yes, Belfast S T P                  |                   |
| ME | Waldo      | Maine Resources                       | Unknown  | No                                  | No                |
| ME | Waldo      | Moore's Septic                        | WWTP     | No                                  | No                |
| ME | Waldo      | Searsport Wastewater Treatment Plant  | WWTP     | No                                  | Yes, WWTP         |
| ME | Waldo      | Winterport Wastewater Treatment Plant | WWTP     | No                                  | Yes, WWTP         |
| ME | Washington | Eastport Wastewater Treatment Plant   | WWTP     | No                                  | Yes, WWTP         |
| ME | Washington | Lubec Wastewater Treatment Plant      | WWTP     | No                                  | Yes, WWTP         |
| ME | Washington | Machias Wastewater Treatment Plant    | WWTP     | Yes, Machias WWTF                   |                   |
| ME | Washington | NCTAMS Cutler                         | Military | No                                  | Yes, Military     |
| ME | Washington | NCTAMS LANT Det - Salvage Area        | Military | No                                  | Yes, Military     |
| MI | Cass       | M-60 Tanker Spill                     | Unknown  | No                                  | Yes, AFFF Release |
| MI | Lapeer     | Lapeer Wastewater Treatment Plant     | WWTP     | No                                  | Yes, WWTP         |
| MI | Oakland    | Adept Plastic Finishing Inc. Factory  | Industry | Yes, Tribar Manufacturing (Plant 5) |                   |
| MI | Oakland    | Advanced Disposal                     | Industry | Yes, Collier Road Landfill          |                   |



|    |         |                                                                        |          |                                      |                                            |
|----|---------|------------------------------------------------------------------------|----------|--------------------------------------|--------------------------------------------|
|    |         | Services<br>Solid Waste<br>Midwest                                     |          |                                      |                                            |
| MI | Oakland | Chor<br>Industries                                                     | Industry | Yes, Chor Industries, Inc            |                                            |
| MI | Oakland | Color Coat<br>Plating<br>Company                                       | Industry | No                                   | Yes, Metal Plating                         |
| MI | Oakland | Commerce<br>Twp<br>Wastewater<br>Treatment<br>Plant                    | WWTP     | Yes, Walled Lake WWTP                |                                            |
| MI | Oakland | Controlled<br>Power<br>Company                                         | Industry | Yes, Controlled Power Co             |                                            |
| MI | Oakland | Depor<br>Industries<br>(Troy)                                          | Industry | Yes, Depor Industries                |                                            |
| MI | Oakland | Dynamic<br>Robotic<br>Solutions                                        | Industry | No                                   | Yes, Electronic Component<br>Manufacturing |
| MI | Oakland | Gerald Ford<br>International<br>Airport                                | Airport  | No                                   | Yes, Major Airport                         |
| MI | Oakland | Lear Siegler<br>Inc                                                    | Industry | Yes, Eagle Ottawa<br>Rochester Hills |                                            |
| MI | Oakland | Lyon<br>Township<br>Wastewater<br>Treatment<br>Plant                   | WWTP     | No                                   | Yes, WWTP                                  |
| MI | Oakland | Merlin<br>Entertainme<br>nts - Sea<br>Life<br>Michigan                 | Industry | No                                   | Yes, Landfill                              |
| MI | Oakland | Oakland Co-<br>Pontiac<br>Wastewater<br>Treatment<br>Plant             | WWTP     | Yes, Pontiac STP                     |                                            |
| MI | Oakland | Oakland<br>Heights<br>Developmen<br>t Landfill                         | Industry | No                                   | Yes, Landfill                              |
| MI | Oakland | RJL Equity<br>Holdings                                                 | Industry | Yes, Sanicem Landfill                |                                            |
| MI | Oakland | Southeastern<br>Oakland<br>County<br>Resource<br>Recovery<br>Authority | Industry | No                                   | Yes, Landfill                              |

|    |         |                                                            |                |                                                           |                                             |
|----|---------|------------------------------------------------------------|----------------|-----------------------------------------------------------|---------------------------------------------|
| MI | Oakland | Waste Management of MI - Eagle Valley Recycle and Disposal | Landfill       | Yes, Waste Management of Michigan, Inc                    |                                             |
| MI | Oakland | Waterford Hills Landfill                                   | Landfill       | Yes, MI Department of Natural Resources & The Environment |                                             |
| MI | Oakland | Wixom Wastewater Treatment Plant                           | WWTP           | Yes, Wixon STP                                            |                                             |
| MI | Wayne   | Aevidas Specialty Services Corp.                           | Industry       | Yes, Aevidas Specialty Services Corp                      |                                             |
| MI | Wayne   | Arted Chrome Plating                                       | Industry       | Yes, Arted Chrome Plating Inc                             |                                             |
| MI | Wayne   | City of Livonia - Type III Landfill                        | Landfill       | Yes, 32500 City of Livonia LF Site                        |                                             |
| MI | Wayne   | Dana Container Tank Cleaning Division                      | Industry       | Yes, Dana Container Inc                                   |                                             |
| MI | Wayne   | Detroit Chrome, Inc. dba DCI Aerotech                      | Industry       | Yes, Detroit Chrome Electro Forming Company               |                                             |
| MI | Wayne   | Detroit Diesel Corporation                                 | Industry       | No                                                        | Yes, Fabricated Metal Product Manufacturing |
| MI | Wayne   | Disposal and Recycling Technologies                        | Industry       | Yes, Clean Earth of Michigan LLC                          |                                             |
| MI | Wayne   | Downriver Wastewater Treatment Plant                       | WWTP           | No                                                        | Yes, WWTP                                   |
| MI | Wayne   | DSC McLouth Steel Gibraltar Plant                          | Superfund Site | No                                                        | No                                          |
| MI | Wayne   | Du-Wel Metals                                              | Industry       | No                                                        | Yes, Electroplating                         |
| MI | Wayne   | Dynamic Metal Finishing                                    | Industry       | Yes, Dynamic Metal Finishing Inc                          |                                             |

|    |       |                                                                                          |          |                                                             |                                                |
|----|-------|------------------------------------------------------------------------------------------|----------|-------------------------------------------------------------|------------------------------------------------|
| MI | Wayne | EnviroSolid<br>s                                                                         | Industry | Yes, EnviroSolids, L.L.C.                                   |                                                |
| MI | Wayne | EQ Detroit<br>dba US<br>Ecology                                                          | Industry | Yes, EQ Detroit Inc                                         |                                                |
| MI | Wayne | Ford Motor<br>Company -<br>Allen Park<br>Clay Mine<br>Landfill                           | Landfill | Yes, Ford Motor Co Allen<br>Park Landfill                   |                                                |
| MI | Wayne | Ford Motor<br>Company -<br>Dearborn<br>Truck Plant                                       | Industry | No                                                          | Yes, Fabricated Metal Product<br>Manufacturing |
| MI | Wayne | Ford Motor<br>Company -<br>New Model<br>Program<br>Developmen<br>t Center                | Industry | No                                                          | Yes, Fabricated Metal Product<br>Manufacturing |
| MI | Wayne | G2O Energy                                                                               | Industry | No                                                          | Yes, Fabricated Metal Product<br>Manufacturing |
| MI | Wayne | General<br>Motors,<br>Orion<br>Assembly                                                  | Industry | No                                                          | No                                             |
| MI | Wayne | GLWA<br>WRRF                                                                             | WWTP     | No                                                          | Yes, WWTP                                      |
| MI | Wayne | Gordie<br>Howe<br>International<br>Bridge U.S.<br>Port of<br>Entry<br>(Customs<br>Plaza) | Industry | No                                                          | No                                             |
| MI | Wayne | GST<br>AuthoLeath<br>er                                                                  | Industry | Yes, GST Autoleather Inc                                    |                                                |
| MI | Wayne | Hajjar<br>Plating<br>Services                                                            | Industry | Yes, Micro Platers Sales<br>(DBA Hajjar Plating<br>Service) |                                                |
| MI | Wayne | Henry Ford<br>Hospital                                                                   | Industry | No                                                          | No                                             |
| MI | Wayne | Ithaca<br>Sanitary<br>Landfill                                                           | Landfill | No                                                          | Yes, Landfill                                  |
| MI | Wayne | McDonald<br>Store Fire                                                                   | AFFF     | No                                                          | Yes, AFFF Release                              |
| MI | Wayne | McGean-<br>Rohco                                                                         | Industry | Yes, McGean-Rohco Inc                                       |                                                |
| MI | Wayne | MDOT -<br>Parcel 5348                                                                    | Industry | No                                                          | No                                             |
| MI | Wayne | RACER<br>Eckles Road                                                                     | Industry | No                                                          | Yes, Metal Plating                             |

|    |             |                                                                              |          |                                                                  |                                                   |
|----|-------------|------------------------------------------------------------------------------|----------|------------------------------------------------------------------|---------------------------------------------------|
| MI | Wayne       | RACER<br>Lansing<br>Plant &<br>Adams<br>Plating plant                        | Industry | No                                                               | Yes, Metal Plating                                |
| MI | Wayne       | RACER<br>Willow Run                                                          | Industry | No                                                               | Yes, Metal Plating                                |
| MI | Wayne       | S Huron<br>Valley UA<br>Wastewater<br>Treatment<br>Plant                     | WWTP     | Yes, Huron Valley<br>WWTP-South                                  |                                                   |
| MI | Wayne       | Schaefer<br>Road<br>Wastewater<br>Treatment<br>Plant                         | WWTP     | No                                                               | Yes, WWTP                                         |
| MI | Wayne       | Strength<br>Environmen<br>tal                                                | Industry | Yes, Environmental<br>Waste Control, Inc.                        |                                                   |
| MI | Wayne       | US Ecology<br>Michigan                                                       | Industry | Yes, Dynecol Inc                                                 |                                                   |
| MI | Wayne       | US Ecology<br>Romulus                                                        | Industry | No                                                               | Yes, Nonhazardous Waste<br>Treatment and Disposal |
| MI | Wayne       | Waste<br>Managemen<br>t of MI -<br>Woodland<br>Meadows<br>North<br>Landfill  | Landfill | No                                                               | Yes, Landfill                                     |
| MI | Wayne       | Waste<br>Managemen<br>t of MI -<br>Woodland<br>Meadows<br>RDF - Van<br>Buren | Landfill | Yes, Waste Management<br>of Michigan Incorporated                |                                                   |
| MI | Wayne       | Z<br>Technologie<br>s<br>Corporation                                         | Industry | Yes, Z Technologies<br>Corp.                                     |                                                   |
| MN | Koochiching | Koochiching<br>County<br>Landfill                                            | Landfill | Yes, Koochiching                                                 |                                                   |
| MN | Meeker      | Meeker<br>County<br>Landfill                                                 | Landfill | Yes, Meeker County                                               |                                                   |
| MN | St. Louis   | Cook Area<br>Landfill                                                        | Landfill | Yes, Cook Area Modified                                          |                                                   |
| MN | St. Louis   | Cotton Area<br>Landfill                                                      | Landfill | No                                                               | Yes, Landfill                                     |
| MN | St. Louis   | Duluth Air<br>National<br>Guard Base                                         | Military | Yes, Duluth IAP, Duluth<br>Intl, Duluth International<br>Airport |                                                   |

|    |            |                                                  |                |                                                                                                                                                                                                                                             |                             |
|----|------------|--------------------------------------------------|----------------|---------------------------------------------------------------------------------------------------------------------------------------------------------------------------------------------------------------------------------------------|-----------------------------|
| MN | St. Louis  | Floodwood Landfill                               | Landfill       | No                                                                                                                                                                                                                                          | Yes, Landfill               |
| MN | St. Louis  | Hibbing Landfill                                 | Landfill       | Yes, Hibbig                                                                                                                                                                                                                                 |                             |
| MN | St. Louis  | Highway 77 Landfill                              | Landfill       | Yes, Highway 77 Seasonal                                                                                                                                                                                                                    |                             |
| MN | St. Louis  | Hoyt Lakes Landfill                              | Landfill       | Yes, Hoyt Lakes                                                                                                                                                                                                                             |                             |
| MN | St. Louis  | Northwoods Landfill                              | Landfill       | No                                                                                                                                                                                                                                          | Yes, Landfill               |
| MN | St. Louis  | Orr Landfill                                     | Landfill       | No                                                                                                                                                                                                                                          | Yes, Landfill               |
| MN | St. Louis  | Western Lake Superior Sanitary District Landfill | Landfill       | Yes, Wlssd Rice Lake Transfer Stat, Western Lake Superior Sanitary District Landfill                                                                                                                                                        |                             |
| MN | Washington | 3M Chemolite                                     | Industry       | Yes, 92537 - 3M cottage grove center, 94596 - 3M cottage grove center, 93835 - 3M Cottage grove center, 95763 - 3M cottage grove center, 95158 - 3 M cottage grove center, 94464 - 3M cottage grove center, 95768 - 3M cottage grove center |                             |
| MN | Washington | 3M Oakdale Disposal Site                         | Industry       | Yes, 3M Oakdale Disposal Site                                                                                                                                                                                                               |                             |
| MN | Washington | 3M Woodbury                                      | Industry       | No                                                                                                                                                                                                                                          | Yes, Chemical Manufacturing |
| MN | Washington | East Metro Superfund PFAS Area                   | Superfund Site | No                                                                                                                                                                                                                                          | Yes, Petroleum Refineries   |
| MN | Washington | Lake Elmo                                        | Industry       | No                                                                                                                                                                                                                                          | No                          |
| MN | Washington | St. Paul Park                                    | Industry       | No                                                                                                                                                                                                                                          | No                          |
| MN | Washington | Washington County Landfill                       | Landfill       | Yes, Washington County                                                                                                                                                                                                                      |                             |
| MS | Forrest    | Camp Shelby                                      | Military       | Yes, Camp Shelby Railhead Facility                                                                                                                                                                                                          |                             |
| MS | Harrison   | Gulfport Combat Readiness Training Center        | Military       | Yes, Gulfport Army Air Field                                                                                                                                                                                                                |                             |
| MS | Harrison   | Gulfport Naval Construction Battalion Center     | Military       | Yes, CBC Gulfport MS                                                                                                                                                                                                                        |                             |
| MS | Harrison   | Keesler Air Force Base                           | Military       | Yes, Keesler AFB                                                                                                                                                                                                                            |                             |

|    |            |                                   |          |                                 |                                             |
|----|------------|-----------------------------------|----------|---------------------------------|---------------------------------------------|
| MS | Lauderdale | Key Field Air National Guard Base | Military | Yes, Key Military AFB           |                                             |
| MS | Lauderdale | Naval Air Station Meridian        | Military | Yes, Naval Air Station Meridian |                                             |
| MS | Lowndes    | Columbus Air Force Base           | Military | Yes, Columbus AFB               |                                             |
| NH | Cheshire   | 32 Washington Street              | Unknown  | No                              | No                                          |
| NH | Cheshire   | Achille Agway                     | Unknown  | No                              | No                                          |
| NH | Cheshire   | Aubuchon                          | Unknown  | No                              | No                                          |
| NH | Cheshire   | Camp Takodah Ymca                 | Unknown  | No                              | No                                          |
| NH | Cheshire   | Central Screw                     | Industry | No                              | Yes, Fabricated Metal Product Manufacturing |
| NH | Cheshire   | Continental Industries            | Industry | Yes, Continental Cable          |                                             |
| NH | Cheshire   | Dublin Municipal Landfill         | Landfill | No                              | Yes, Landfill                               |
| NH | Cheshire   | Esslinger Oil Undercoating        | Industry | No                              | No                                          |
| NH | Cheshire   | Findings Inc                      | Industry | No                              | No                                          |
| NH | Cheshire   | Former A.C. Lawrence Tannery Site | Landfill | Yes, A C Lawrence Leather       |                                             |
| NH | Cheshire   | Former Elite Laundry Site         | Industry | No                              | No                                          |
| NH | Cheshire   | Former McGoldrick Property        | Unknown  | Yes, McGoldrick Paper Co inc    |                                             |
| NH | Cheshire   | Former Zinn's Bowling Lanes       | Unknown  | No                              | No                                          |
| NH | Cheshire   | Franklin Pierce                   | Unknown  | No                              | No                                          |
| NH | Cheshire   | Gilsum Landfill                   | Landfill | No                              | Yes, Landfill                               |
| NH | Cheshire   | Harrisville Landfill              | Landfill | No                              | Yes, Landfill                               |
| NH | Cheshire   | Hinsdale Products Landfill        | Landfill | No                              | Yes, Landfill                               |
| NH | Cheshire   | Jaffrey Landfill and Wastewater   | Landfill | Yes, Jaffrey WWTP               |                                             |

|    |          | Treatment Plant                    |                                    |                                                                                 |               |
|----|----------|------------------------------------|------------------------------------|---------------------------------------------------------------------------------|---------------|
| NH | Cheshire | John Perkins Elementary School     | Unknown                            | No                                                                              | No            |
| NH | Cheshire | Keene Municipal Landfill           | Landfill                           | YES, Landfill Recycling Cntr & Transfer St, Keene Landfill and Recycling Center |               |
| NH | Cheshire | Keene Old City Landfill            | Landfill                           | No                                                                              | Yes, Landfill |
| NH | Cheshire | Main Street Sunoco                 | Industry                           | No                                                                              | No            |
| NH | Cheshire | Marlborough Landfill               | Landfill                           | No                                                                              | Yes, Landfill |
| NH | Cheshire | Marlow Municipal Landfill          | Landfill                           | No                                                                              | Yes, Landfill |
| NH | Cheshire | Meadowood Assembly Hall            | Unknown                            | No                                                                              | No            |
| NH | Cheshire | Meadowood Fire Training Facility   | Fire Department/ Training Facility | Yes, Meadowood fire training facility                                           |               |
| NH | Cheshire | People's Laundry Facility          | Industry                           | No                                                                              | No            |
| NH | Cheshire | Plaistow Municipal Landfill        | Landfill                           | No                                                                              | Yes, Landfill |
| NH | Cheshire | PSNH 227                           | Industry                           | No                                                                              | No            |
| NH | Cheshire | Riverside Plaza                    | Unknown                            | No                                                                              | No            |
| NH | Cheshire | Timken Super Precision             | Landfill                           | Yes, MPB Corp (DBA Timken aerospace)                                            |               |
| NH | Cheshire | Troy Landfill                      | Landfill                           | No                                                                              | Yes, Landfill |
| NH | Cheshire | Troy Mills Rockwood Brook Landfill | Landfill                           | No                                                                              | Yes, Landfill |
| NH | Cheshire | Walpole Landfill                   | Landfill                           | No                                                                              | Yes, Landfill |
| NH | Cheshire | Wastewater Cross Tack Pile         | Industry                           | No                                                                              | No            |
| NH | Cheshire | Westmoreland Landfill              | Landfill                           | No                                                                              | Yes, Landfill |
| NH | Grafton  | Ashland Landfill                   | Landfill                           | No                                                                              | Yes, Landfill |
| NH | Grafton  | Ashland Wastewater Treatment       | WWTP                               | Yes, Ashland WWTP                                                               |               |

|    |         |                                                     |          |                                                       |                                            |
|----|---------|-----------------------------------------------------|----------|-------------------------------------------------------|--------------------------------------------|
|    |         | Facility<br>UWW<br>Lagoon                           |          |                                                       |                                            |
| NH | Grafton | Bethlehem<br>Town<br>Landfill                       | Landfill | No                                                    | Yes, Landfill                              |
| NH | Grafton | Bond Optics                                         | Industry | No                                                    | No                                         |
| NH | Grafton | Boudreau<br>Septage<br>Lagoon                       | Waste    | No                                                    | No                                         |
| NH | Grafton | Bridgewater<br>Dump &<br>Incinerator                | Landfill | Yes, Hebron bridgewater<br>resource recovery facility |                                            |
| NH | Grafton | Canaan<br>Wastewater<br>Treatment<br>Facility       | WWTP     | No                                                    | Yes, WWTP                                  |
| NH | Grafton | Cardigan<br>Mountain                                | Unknown  | No                                                    | No                                         |
| NH | Grafton | Cold<br>Regions<br>Research &<br>Engineering<br>Lab | Industry | No                                                    | No                                         |
| NH | Grafton | Dartmouth<br>Rennie Farm<br>Site                    | Industry | No                                                    | No                                         |
| NH | Grafton | Faran<br>Property                                   | Unknown  | No                                                    | No                                         |
| NH | Grafton | Former Cray<br>Oil Facility                         | Industry | No                                                    | No                                         |
| NH | Grafton | Former<br>Gary's Fuels                              | Unknown  | No                                                    | No                                         |
| NH | Grafton | Former<br>Hunt's Auto                               | Unknown  | No                                                    | No                                         |
| NH | Grafton | Former<br>L.W.<br>Packard Mill                      | Industry | No                                                    | Yes, Textile Mills                         |
| NH | Grafton | Framatome<br>Connectors<br>USA                      | Unknown  | No                                                    | Yes, Electronic Component<br>Manufacturing |
| NH | Grafton | Freudenberg<br>-NOK                                 | Industry | No                                                    | No                                         |
| NH | Grafton | Glencliff<br>Home                                   | Unknown  | No                                                    | No                                         |
| NH | Grafton | Grafton Old<br>Landfill                             | Landfill | No                                                    | Yes, Landfill                              |
| NH | Grafton | Groton<br>Town Dump                                 | Landfill | No                                                    | Yes, Landfill                              |
| NH | Grafton | Hanover<br>Consumer<br>Coop<br>Society              | Industry | No                                                    | No                                         |
| NH | Grafton | Holderness<br>Landfill                              | Landfill | No                                                    | Yes, Landfill                              |



|    |              |                                                            |          |                                                                                     |                                             |
|----|--------------|------------------------------------------------------------|----------|-------------------------------------------------------------------------------------|---------------------------------------------|
| NH | Grafton      | Hypertherm, Inc.                                           | Industry | No                                                                                  | Yes, Electronic Component Manufacturing     |
| NH | Grafton      | Indeck Energy Center                                       | Industry | No                                                                                  | No                                          |
| NH | Grafton      | Lebanon Landfill                                           | Landfill | Yes, Lebanon, City of - Solid Waste Facility, Lebanon Landfill and Recycling Center |                                             |
| NH | Grafton      | Lincoln Wastewater Treatment Facility UWW Lagoon           | WWTP     | Yes, Lincoln WWTP                                                                   |                                             |
| NH | Grafton      | Lisbon Landfill                                            | Landfill | No                                                                                  | Yes, Landfill                               |
| NH | Grafton      | Littleton Town Landfill                                    | Landfill | No                                                                                  | Yes, Landfill                               |
| NH | Grafton      | NCES Landfill                                              | Landfill | Yes, NCES Landfill                                                                  |                                             |
| NH | Grafton      | Norton Landfill                                            | Landfill | No                                                                                  | Yes, Landfill                               |
| NH | Grafton      | Orford Landfill                                            | Landfill | No                                                                                  | Yes, Landfill                               |
| NH | Grafton      | Piermont Landfill                                          | Landfill | No                                                                                  | Yes, Landfill                               |
| NH | Grafton      | Plymouth Incinerator and Ash Landfill                      | Landfill | Yes, Plymouth Recycle Center, Town of                                               |                                             |
| NH | Grafton      | Rumney Transfer Station                                    | Landfill | No                                                                                  | Yes, Landfill                               |
| NH | Grafton      | Schofield Septage                                          | WWTP     | No                                                                                  | No                                          |
| NH | Grafton      | Thornton Landfill                                          | Landfill | No                                                                                  | Yes, Landfill                               |
| NH | Grafton      | Timken Aerospace                                           | Industry | No                                                                                  | Yes, Fabricated Metal Product Manufacturing |
| NH | Grafton      | Warren Landfill                                            | Landfill | No                                                                                  | Yes, Landfill                               |
| NH | Grafton      | Waterville Valley Wastewater Treatment Facility UWW Lagoon | WWTP     | Yes, Waterville Valley WWTP                                                         |                                             |
| NH | Grafton      | Wentworth Landfill                                         | Unknown  | No                                                                                  | Yes, Landfill                               |
| NH | Hillsborough | 122 McGregor Street                                        | Unknown  | No                                                                                  | No                                          |

|    |              |                                      |                |                         |                                             |
|----|--------------|--------------------------------------|----------------|-------------------------|---------------------------------------------|
| NH | Hillsborough | 14 Depot Street                      | Unknown        | No                      | No                                          |
| NH | Hillsborough | 323 DW Highway                       | Unknown        | No                      | No                                          |
| NH | Hillsborough | 55 Central Street                    | Unknown        | No                      | No                                          |
| NH | Hillsborough | Alltex Uniform Rental Service Inc    | Industry       | No                      | No                                          |
| NH | Hillsborough | Bedford Landfill                     | Landfill       | No                      | Yes, Landfill                               |
| NH | Hillsborough | Benson Park                          | Landfill       | No                      | Yes, Landfill                               |
| NH | Hillsborough | Bronze Craft                         | Industry       | No                      | Yes, Fabricated Metal Product Manufacturing |
| NH | Hillsborough | Brooks Property                      | Unknown        | No                      | No                                          |
| NH | Hillsborough | Brookside Mini Mart                  | Unknown        | No                      | No                                          |
| NH | Hillsborough | Brown's Septage Pits                 | Superfund Site | No                      | No                                          |
| NH | Hillsborough | Burns Hill Road Landfill             | Landfill       | No                      | Yes, Landfill                               |
| NH | Hillsborough | Central Portion of Howe Drive        | Superfund Site | No                      | No                                          |
| NH | Hillsborough | Cintas Corp - 341 Taylor St Facility | Industry       | No                      | No                                          |
| NH | Hillsborough | Clocktower Place                     | Unknown        | Yes, W H Bagshaw Co Inc |                                             |
| NH | Hillsborough | Comcast                              | Unknown        | No                      | No                                          |
| NH | Hillsborough | Computer Optics                      | Industry       | No                      | Yes, Electronic Component Manufacturing     |
| NH | Hillsborough | Crotched Mountain Rehab              | Waste          | No                      | No                                          |
| NH | Hillsborough | E & R Laundry                        | Industry       | No                      | No                                          |
| NH | Hillsborough | Eversource Energy (Former Psnh)      | Industry       | No                      | No                                          |
| NH | Hillsborough | Fab Braze Corp                       | Industry       | No                      | Yes, Fabricated Metal Product Manufacturing |
| NH | Hillsborough | Fimbel Door Tannery Sludge Landfill  | Landfill       | No                      | Yes, Leather Tanning                        |
| NH | Hillsborough | Former ACT                           | Unknown        | Yes, Sheldhal           |                                             |
| NH | Hillsborough | Former Elexsys International         | Unknown        | No                      | Yes, Electronic Component Manufacturing     |

|    |              |                                         |          |                                                 |                               |
|----|--------------|-----------------------------------------|----------|-------------------------------------------------|-------------------------------|
| NH | Hillsborough | Former Nashua Motor Express             | Industry | No                                              | No                            |
| NH | Hillsborough | Former Nashua Site                      | Unknown  | Yes, Nashua Coated Paper Products Plant         |                               |
| NH | Hillsborough | Former Textiles Coated International    | Industry | Yes, Rontex America Inc                         |                               |
| NH | Hillsborough | Former University Center                | Unknown  | No                                              | No                            |
| NH | Hillsborough | Four Hills Landfill                     | Landfill | Yes, Four Hills Landfill Gas System             |                               |
| NH | Hillsborough | Gilson Road Site                        | Industry | No                                              | No                            |
| NH | Hillsborough | GI & V Pulp Group                       | Industry | No                                              | Yes, Paper Mill               |
| NH | Hillsborough | Goffstown DPW Garage                    | Unknown  | No                                              | No                            |
| NH | Hillsborough | Goffstown Landfill                      | Landfill | Yes, Goffstown Landfill                         |                               |
| NH | Hillsborough | Hacros Chemicals                        | Industry | Yes, Watson Park (Former Hacrocs chemical site) |                               |
| NH | Hillsborough | Hampshire Chemical Corp                 | Industry | Yes, Hampshire Chemical                         |                               |
| NH | Hillsborough | Hancock Landfill                        | Landfill | No                                              | Yes, Landfill                 |
| NH | Hillsborough | Hillsboro Wastewater Treatment Facility | WWTP     | No                                              | Yes, WWTP                     |
| NH | Hillsborough | Hillsborough Area Work Center           | Unknown  | No                                              | No                            |
| NH | Hillsborough | Hillsborough Landfill                   | Landfill | No                                              | Yes, Landfill                 |
| NH | Hillsborough | Hitchiner Manufacturing Landfill        | Landfill | No                                              | Yes, Landfill                 |
| NH | Hillsborough | JCM Management                          | Unknown  | Yes, EPE Corp                                   |                               |
| NH | Hillsborough | Liberty Utilities                       | Industry | No                                              | No                            |
| NH | Hillsborough | Lincoln Park                            | Unknown  | No                                              | No                            |
| NH | Hillsborough | Longa Disposal Area                     | Waste    | No                                              | Yes, Hazardous Waste Disposal |
| NH | Hillsborough | Majestic Motors                         | Industry | No                                              | No                            |

|    |              |                              |          |                                                          |                    |
|----|--------------|------------------------------|----------|----------------------------------------------------------|--------------------|
| NH | Hillsborough | Manchester Landfill          | Landfill | Yes, Manchester, City of - Landfill, Manchester Landfill |                    |
| NH | Hillsborough | Manchester Place             | Unknown  | No                                                       | No                 |
| NH | Hillsborough | Manchester Transit Authority | Industry | No                                                       | No                 |
| NH | Hillsborough | Meadow Brook Crossing        | Unknown  | Resin Systems Corporation                                | No                 |
| NH | Hillsborough | Melba Burton Property        | Unknown  | No                                                       | No                 |
| NH | Hillsborough | Merrimack Landfill           | Landfill | No                                                       | Yes, Landfill      |
| NH | Hillsborough | Milford Sludge Disposal Land | WWTP     | Yes, Milford WWTF                                        |                    |
| NH | Hillsborough | Milford Transfer Station     | Landfill | No                                                       | Yes, Landfill      |
| NH | Hillsborough | Mill West                    | Unknown  | No                                                       | Yes, Textile Mills |
| NH | Hillsborough | Monadnock Paper Mill         | Industry | No                                                       | Yes, Paper Mill    |
| NH | Hillsborough | Nashua Riverside Landfill    | Landfill | No                                                       | Yes, Landfill      |
| NH | Hillsborough | Nashua Road Property         | Unknown  | No                                                       | No                 |
| NH | Hillsborough | New Boston Air Force Station | Military | No                                                       | Yes, Military      |
| NH | Hillsborough | New Boston Landfill          | Landfill | No                                                       | Yes, Landfill      |
| NH | Hillsborough | New Ipswich Landfill         | Landfill | No                                                       | Yes, Landfill      |
| NH | Hillsborough | NH Plating Company           | Industry | No                                                       | Yes, Metal Plating |
| NH | Hillsborough | Peterborough Town Landfill   | Landfill | No                                                       | Yes, Landfill      |
| NH | Hillsborough | Ray's Chevron Station        | Industry | No                                                       | No                 |
| NH | Hillsborough | Roketenetz Landfill          | Landfill | Yes, BFI - Pelham Landfill                               |                    |
| NH | Hillsborough | Rousell/Gardner Park         | Landfill | No                                                       | Yes, Landfill      |
| NH | Hillsborough | Rr Donnelley Co              | Unknown  | Yes, RR Donnelley - Manchester Forms & Labels            |                    |

|    |              |                                                 |                |                                                  |                               |
|----|--------------|-------------------------------------------------|----------------|--------------------------------------------------|-------------------------------|
|    |              | Formermoore Business Forms                      |                |                                                  |                               |
| NH | Hillsborough | Saint Gobain Performance Plastics               | Industry       | Yes, Chemfab - Saint Gobain Performance Plastics |                               |
| NH | Hillsborough | Sargent Camp Nature Classroom Wastewater Lagoon | Unknown        | No                                               | No                            |
| NH | Hillsborough | Savage Municipal Water Supply                   | Superfund Site | No                                               | No                            |
| NH | Hillsborough | Shady Lane Landfill                             | Landfill       | No                                               | Yes, Landfill                 |
| NH | Hillsborough | Souhegan Landfill                               | Landfill       | No                                               | Yes, Landfill                 |
| NH | Hillsborough | South Municipal Water Supply Well               | Superfund Site | No                                               | No                            |
| NH | Hillsborough | South Municipal Well                            | Superfund Site | Yes, Peterborough WWTP                           |                               |
| NH | Hillsborough | Southern Portion of Caldwell Drive              | Superfund Site | No                                               | No                            |
| NH | Hillsborough | Spear NH                                        | Unknown        | Yes, Spear - New Hampshire Inc                   |                               |
| NH | Hillsborough | Sunshine Fabricare                              | Industry       | No                                               | No                            |
| NH | Hillsborough | Sylvester Superfund Site                        | Superfund Site | No                                               | Yes, Hazardous Waste Disposal |
| NH | Hillsborough | Trowbridge Drive Area                           | Unknown        | No                                               | No                            |
| NH | Hillsborough | Warwick Mills Septic                            | WWTP           | Yes, Warwick Mills Incorporated                  |                               |
| NH | Hillsborough | Weare Transfer Station                          | Landfill       | No                                               | Yes, Landfill                 |
| NH | Hillsborough | Webster Square Shopping Center                  | Unknown        | No                                               | No                            |
| NH | Hillsborough | West Road Municipal Landfill                    | Landfill       | No                                               | Yes, Landfill                 |

|    |              |                                       |                |                                  |                                 |
|----|--------------|---------------------------------------|----------------|----------------------------------|---------------------------------|
| NH | Hillsborough | Wilton Packaging Group                | Industry       | Yes, WS Packaging Group          |                                 |
| NH | Hillsborough | Wilton Sanitary Landfill              | Landfill       | Yes, Wilton Recycling Center     |                                 |
| NH | Rockingham   | 139 Folly Mill Road                   | Unknown        | No                               | No                              |
| NH | Rockingham   | 150 Mirona Road Property              | Unknown        | No                               | No                              |
| NH | Rockingham   | 227A Atlantic Avenue Area Site        | Industry       | No                               | No                              |
| NH | Rockingham   | 23 Bus Road                           | Unknown        | No                               | No                              |
| NH | Rockingham   | 24 Scobie Pond Road                   | Unknown        | No                               | No                              |
| NH | Rockingham   | 28 Commercial Court                   | Industry       | No                               | No                              |
| NH | Rockingham   | 610 Lafayette Road                    | Industry       | No                               | No                              |
| NH | Rockingham   | 97 Shoppes - Commercial Septic System | WWTP           | No                               | No                              |
| NH | Rockingham   | Antique Repair Company                | Unknown        | No                               | No                              |
| NH | Rockingham   | Appletree Mall                        | Waste          | No                               | No                              |
| NH | Rockingham   | Atkinson Country Club                 | Unknown        | No                               | No                              |
| NH | Rockingham   | Auburn Landfill                       | Landfill       | No                               | Yes, Landfill                   |
| NH | Rockingham   | Auburn Road Landfill                  | Landfill       | No                               | Yes, Landfill                   |
| NH | Rockingham   | Beede Waste Oil                       | Superfund Site | No                               | Yes, Hazardous Waste Collection |
| NH | Rockingham   | Bodwell Septage Lagoon & Treatment    | Industry       | No                               | No                              |
| NH | Rockingham   | Bulky Waste Landfill                  | Landfill       | No                               | Yes, Landfill                   |
| NH | Rockingham   | Buxton Oil                            | Industry       | No                               | No                              |
| NH | Rockingham   | Candia Landfill                       | Landfill       | Yes, Candia Recycling Center     |                                 |
| NH | Rockingham   | Central Metal Finishing               | Industry       | Yes, Central Metal Finishing Inc |                                 |

|    |            |                                                |          |                                |                                             |
|----|------------|------------------------------------------------|----------|--------------------------------|---------------------------------------------|
| NH | Rockingham | Chart Industries (Former Process Engineering ) | Industry | No                             | Yes, Fabricated Metal Product Manufacturing |
| NH | Rockingham | Chester Landfill                               | Landfill | No                             | Yes, Landfill                               |
| NH | Rockingham | Co-ed Sportswear                               | Unknown  | No                             | No                                          |
| NH | Rockingham | Coakley Landfill                               | Landfill | No                             | Yes, Landfill                               |
| NH | Rockingham | Cookson EleCenteron ics                        | Industry | No                             | Yes, Electronic Component Manufacturing     |
| NH | Rockingham | Cross Road Landfill                            | Landfill | No                             | Yes, Landfill                               |
| NH | Rockingham | Daisy Cleaners                                 | Industry | No                             | No                                          |
| NH | Rockingham | DDR Seabrook                                   | Unknown  | Yes, Seabrook Transfer Station |                                             |
| NH | Rockingham | Deerfield Landfill                             | Landfill | No                             | Yes, Landfill                               |
| NH | Rockingham | Derry Municipal Landfill                       | Landfill | No                             | Yes, Landfill                               |
| NH | Rockingham | DFSP Newington                                 | Military | No                             | Yes, Military                               |
| NH | Rockingham | Emery Drive Site                               | Unknown  | No                             | No                                          |
| NH | Rockingham | Enterprise Car Rental                          | Unknown  | No                             | No                                          |
| NH | Rockingham | Epping Wastewater Treatment Facility           | WWTP     | Yes, Epping WWTF               |                                             |
| NH | Rockingham | Exeter Wastewater Treatment Facility UWW       | WWTP     | No                             | Yes, WWTP                                   |
| NH | Rockingham | Flight One                                     | Unknown  | No                             | No                                          |
| NH | Rockingham | Fogg Auto Salvage Property                     | Industry | No                             | No                                          |
| NH | Rockingham | Former Alltex Uniform                          | Industry | No                             | No                                          |
| NH | Rockingham | Former Bournival Kia Site                      | Industry | No                             | No                                          |
| NH | Rockingham | Former Essex Mills                             | Industry | No                             | Yes, Electronic Component Manufacturing     |
| NH | Rockingham | Former Foye's                                  | Unknown  | No                             | No                                          |

|    |            |                                      |          |                                       |                                      |
|----|------------|--------------------------------------|----------|---------------------------------------|--------------------------------------|
|    |            | Corner Market Property               |          |                                       |                                      |
| NH | Rockingham | Former Insurance Salvage Auction     | Industry | No                                    | No                                   |
| NH | Rockingham | Former Johnson & Johnson Facility    | Industry | Yes, Johnson & Johnson Associates inc |                                      |
| NH | Rockingham | Former Key Packaging Industries Corp | Industry | No                                    | Yes, Plastics Material Manufacturing |
| NH | Rockingham | Former Lamont Labs                   | Industry | No                                    | Yes, Chemical Manufacturing          |
| NH | Rockingham | Former LeClair Property              | Unknown  | No                                    | No                                   |
| NH | Rockingham | Former Midway Excavators             | Industry | No                                    | No                                   |
| NH | Rockingham | Former Philip Singer Revocable Trust | Unknown  | No                                    | No                                   |
| NH | Rockingham | Former Regis Tannery                 | Industry | No                                    | Yes, Leather Tanning                 |
| NH | Rockingham | Godin Landfill                       | Landfill | Yes, Bay State Disposal               |                                      |
| NH | Rockingham | Grove Road Landfill                  | Landfill | No                                    | Yes, Landfill                        |
| NH | Rockingham | Hadco Printed Circuit                | Industry | Yes, Business Card Express            |                                      |
| NH | Rockingham | Hampton Foreign Auto                 | Industry | No                                    | No                                   |
| NH | Rockingham | Hampton Landfill                     | Landfill | No                                    | Yes, Landfill                        |
| NH | Rockingham | Hampton Toll Plaza                   | Unknown  | No                                    | No                                   |
| NH | Rockingham | Hanscom's Truck Stop, Inc.           | Unknown  | No                                    | No                                   |
| NH | Rockingham | Harding Metals                       | Industry | No                                    | No                                   |
| NH | Rockingham | Henkel Seabrook East Facility        | Industry | No                                    | Yes, Chemical Manufacturing          |



|    |            |                                           |                                       |                 |                                 |
|----|------------|-------------------------------------------|---------------------------------------|-----------------|---------------------------------|
| NH | Rockingham | Impacted Water Supply Wells               | Unknown                               | No              | No                              |
| NH | Rockingham | John's Truck & Auto Salvage               | Industry                              | No              | No                              |
| NH | Rockingham | Jones Landfill and Ash Containment        | Landfill                              | No              | Yes, Landfill                   |
| NH | Rockingham | Keefe Envir                               | Superfund Site                        | No              | Yes, Hazardous Waste Disposal   |
| NH | Rockingham | Kingston Fire Department                  | Fire Department/<br>Training Facility | No              | Yes, Fire Department            |
| NH | Rockingham | Kingston Landfill                         | Landfill                              | No              | Yes, Landfill                   |
| NH | Rockingham | LLS Landfill                              | Landfill                              | No              | Yes, Landfill                   |
| NH | Rockingham | Mammoth Road Area                         | Unknown                               | No              | No                              |
| NH | Rockingham | Manchester-Boston Regional Airport        | Airport                               | Yes, Manchester |                                 |
| NH | Rockingham | Marciano Residence                        | Unknown                               | No              | No                              |
| NH | Rockingham | Mottolo Waste Site                        | Superfund Site                        | No              | No                              |
| NH | Rockingham | Newfields Light Industrial Prk            | Industry                              | No              | No                              |
| NH | Rockingham | Newmarket Landfill                        | Landfill                              | No              | Yes, Landfill                   |
| NH | Rockingham | Newton Municipal Landfill                 | Landfill                              | No              | Yes, Landfill                   |
| NH | Rockingham | North Hampton & Greenland                 | Landfill                              | No              | Yes, Landfill                   |
| NH | Rockingham | Northwood Septage Facility                | WWTP                                  | No              | No                              |
| NH | Rockingham | Nottingham Municipal Solid Waste Facility | Landfill                              | No              | Yes, Landfill                   |
| NH | Rockingham | Old Salem Wastewater Facility             | WWTP                                  | No              | Yes, WWTP                       |
| NH | Rockingham | Ottati & Goss                             | Industry                              | No              | Yes, Hazardous Waste Collection |

|    |            |                                     |                                       |                                           |                      |
|----|------------|-------------------------------------|---------------------------------------|-------------------------------------------|----------------------|
| NH | Rockingham | P&H Transportation                  | Industry                              | No                                        | No                   |
| NH | Rockingham | Pease Air Force Base                | Military                              | Yes, Pease ANGB                           |                      |
| NH | Rockingham | Plaza 28                            | Unknown                               | No                                        | No                   |
| NH | Rockingham | Plaza 800                           | Unknown                               | No                                        | No                   |
| NH | Rockingham | Portsmouth Used Car Center          | Industry                              | No                                        | No                   |
| NH | Rockingham | Prowash Carwash and Lube            | Industry                              | No                                        | No                   |
| NH | Rockingham | Raymond Landfill                    | Landfill                              | No                                        | Yes, Landfill        |
| NH | Rockingham | Rockingham County Complex           | Fire Department/<br>Training Facility | No                                        | Yes, Fire Department |
| NH | Rockingham | Rye Landfill                        | Landfill                              | No                                        | Yes, Landfill        |
| NH | Rockingham | Sanborn Road Area Site              | Unknown                               | No                                        | No                   |
| NH | Rockingham | Schiller Station Closed Landfill    | Landfill                              | No                                        | Yes, Landfill        |
| NH | Rockingham | Shadow Lake Rd                      | Unknown                               | No                                        | No                   |
| NH | Rockingham | Shannon Rd Landfill                 | Landfill                              | No                                        | Yes, Landfill        |
| NH | Rockingham | Simply Green Bulk Facility          | Industry                              | No                                        | No                   |
| NH | Rockingham | Spartan Consolidated                | Industry                              | No                                        | Yes, Landfill        |
| NH | Rockingham | Sprague River Road Terminal         | Industry                              | Yes, Newington Defense Fuel Support Point |                      |
| NH | Rockingham | Stateline Plaza                     | Unknown                               | No                                        | No                   |
| NH | Rockingham | Stratham Fire Department            | Fire Department/<br>Training Facility | No                                        | Yes, Fire Department |
| NH | Rockingham | Stratham Landfill                   | Landfill                              | No                                        | Yes, Landfill        |
| NH | Rockingham | Tim & Jonis Towing & Auto Recycling | Industry                              | No                                        | No                   |
| NH | Rockingham | Tinkham Garage Site                 | Superfund Site                        | No                                        | No                   |

|    |            |                                                 |                |                                               |               |
|----|------------|-------------------------------------------------|----------------|-----------------------------------------------|---------------|
| NH | Rockingham | Tricket Stratham Irving Car Wash                | Industry       | No                                            | No            |
| NH | Rockingham | Walmart Distrib Center Septic                   | WWTP           | No                                            | No            |
| NH | Rockingham | Warde Health Center Sisters Of Mercy Leachfield | Waste          | No                                            | No            |
| NH | Rockingham | Weber Auto & Truck Parts Inc                    | Industry       | No                                            | No            |
| NH | Rockingham | Wentworth Scrap Metal Property                  | Industry       | No                                            | No            |
| NH | Rockingham | Windham Landfill                                | Landfill       | Yes, Windham, Town of                         |               |
| NH | Rockingham | Windham Marine Site                             | Industry       | No                                            | No            |
| NH | Rockingham | Windham Senior Center Area                      | Unknown        | No                                            | No            |
| RI | Kent       | Coventry Training Site                          | Military       | No                                            | Yes, Military |
| RI | Kent       | Picillo Farm                                    | Superfund Site | No                                            | No            |
| RI | Newport    | Naval Station Newport                           | Military       | No                                            | Yes, Military |
| RI | Providence | Landfill & Resource Recovery, Inc. (L&RR)       | Landfill       | No                                            | Yes, Landfill |
| RI | Providence | North Smithfield                                | Military       | No                                            | Yes, Military |
| RI | Providence | Western Sand & Gravel                           | Superfund Site | Yes, Supreme Mid-Atlantic Corp                |               |
| RI | Washington | Davisville Naval Construction Battalion         | Military       | Yes, Devil's Foot Road                        |               |
| RI | Washington | Quonset Air National Guard Base                 | Military       | Yes, Quonset Point NAS, Quonset State Airport |               |
| TN | Blount     | McGhee Tyson Air National Guard Base            | Military       | Yes, Mc Ghee Tyson                            |               |

|    |            |                                          |                                       |                                    |                                         |
|----|------------|------------------------------------------|---------------------------------------|------------------------------------|-----------------------------------------|
| TN | Coffee     | Arnold Air Force Base                    | Military                              | Yes, Arnold Air Force Base         |                                         |
| TN | Davidson   | Nashville Air National Guard Base        | Military                              | Yes, Nashville Intl                |                                         |
| TN | Shelby     | Memphis Air National Guard Base          | Military                              | Yes, Memphis IAP                   |                                         |
| TN | Shelby     | Naval Support Activity Mid-South         | Military                              | Yes, Navsupact Midsouth Memphis TN |                                         |
| VT | Bennington | Bennington Municipal Sanitary Landfill   | Landfill                              | No                                 | Yes, Landfill                           |
| VT | Bennington | Bennington Wastewater Treatment Facility | WWTP                                  | Yes, Bennington WPCF               |                                         |
| VT | Bennington | Burgess Bro Landfill                     | Landfill                              | No                                 | Yes, Landfill                           |
| VT | Bennington | Burgess Brothers C&D Landfill            | Landfill                              | Yes, Burgess Brothers Landfill     |                                         |
| VT | Bennington | Burgess Superfund Site                   | Superfund Site                        | Yes, Burgess Brothers Landfill     |                                         |
| VT | Bennington | Eveready Bennington                      | Industry                              | Yes, Energizer Manufacturing Inc   |                                         |
| VT | Bennington | Former ChemFab Teflon Plant              | Industry                              | Yes, Chemfab                       |                                         |
| VT | Bennington | Former Dodge Farm Dump Site              | Landfill                              | No                                 | Yes, Landfill                           |
| VT | Bennington | Former General Cable Facility            | Industry                              | No                                 | Yes, Electronic Component Manufacturing |
| VT | Bennington | Former Plant No. 3                       | Industry                              | No                                 | Yes, Chemical Manufacturing             |
| VT | Bennington | Old Pownal Landfill (West Landfill)      | Industry                              | No                                 | Yes, Landfill                           |
| VT | Bennington | Pownal Fire Department #2                | Fire Department/<br>Training Facility | No                                 | Yes, Fire Department                    |
| VT | Bennington | Pownal Landfill                          | Landfill                              | Yes, Pownal Transfer Station       |                                         |
| VT | Bennington | Pownal Tannery                           | Industry                              | No                                 | Yes, Leather Tanning                    |

|    |            |                                             |                |                                                      |                                         |
|----|------------|---------------------------------------------|----------------|------------------------------------------------------|-----------------------------------------|
| VT | Bennington | Shaftsbury Landfill                         | Landfill       | Yes, Town of Shaftsbuy Landfill and Recycling        |                                         |
| VT | Bennington | Stunderland Municipal Landfill              | Landfill       | No                                                   | Yes, Landfill                           |
| VT | Bennington | Warren Wire Facility                        | Industry       | No                                                   | Yes, Electronic Component Manufacturing |
| VT | Chittenden | Burlington Air National Guard Base          | Military       | Yes, Burlington INTL                                 |                                         |
| VT | Chittenden | Burlington-Main Wastewater Treatment Plant  | WWTP           | Yes, Burlington Main STP                             |                                         |
| VT | Chittenden | Camp Ethan Allen Training Site              | Military       | Yes, NG TS Ethan Allen Range                         |                                         |
| VT | Chittenden | Champlain Cable                             | Industry       | No                                                   | Yes, Electronic Component Manufacturing |
| VT | Chittenden | Charlotte Landfill                          | Landfill       | None                                                 | Yes, Landfill                           |
| VT | Chittenden | Chittenden Solid Waste District Landfill    | Landfill       | Yes, Environmental Depot                             |                                         |
| VT | Chittenden | Commerce Street Plume                       | Superfund Site | No                                                   | Yes, Metal Plating                      |
| VT | Chittenden | CSWD Williston Lined Landfill               | Landfill       | Yes, Burlington Area Transfer                        |                                         |
| VT | Chittenden | Global Foundries                            | Industry       | Yes, IBM Systems & Technology Semiconductor Facility |                                         |
| VT | Chittenden | Harbour Industry                            | Industry       | No                                                   | Yes, Electronic Component Manufacturing |
| VT | Chittenden | Rathe Landfill                              | Landfill       | No                                                   | Yes, Landfill                           |
| VT | Chittenden | South Burlington Landfill                   | Landfill       | Yes, South Burlington Landfill                       |                                         |
| VT | Chittenden | South Burlington Wastewater Treatment Plant | WWTP           | Yes, S Burlington Arpt Pkway WP                      |                                         |
| VT | Rutland    | Rutland City Landfill                       | Landfill       | Yes, Rutland County Regional Transfer Station        |                                         |
| VT | Rutland    | Rutland-Southern Vermont Regional           | Airport        | Yes, Rutland - Southern Vermont Rgnl                 |                                         |

|    |         |                                 |                                             |                                            |                             |
|----|---------|---------------------------------|---------------------------------------------|--------------------------------------------|-----------------------------|
|    |         | Airport<br>business<br>park     |                                             |                                            |                             |
| VT | Rutland | Vermont<br>Fire<br>Academy      | Military                                    | No                                         | Yes, Fire Training Facility |
| VT | Windsor | Barnard<br>Landfill             | Landfill                                    | No                                         | Yes, Landfill               |
| VT | Windsor | Bethel/Roya<br>lton Landfill    | Landfill                                    | No                                         | Yes, Landfill               |
| VT | Windsor | Bridgewater<br>Landfill         | Landfill                                    | No                                         | Yes, Landfill               |
| VT | Windsor | Old<br>Springfield<br>Landfill  | Landfill                                    | No                                         | Yes, Landfill               |
| WA | King    | Eastside Fire<br>Rescue         | Fire<br>Department/<br>Training<br>Facility | No                                         | Yes, Fire Department        |
| WA | Kitsap  | Naval Base<br>Kitsap-<br>Bangor | Military                                    | Yes, Naval Base Kitsap<br>Bangor           |                             |
| WA | Pierce  | Joint Base<br>Lewis-<br>McChord | Military                                    | Yes, U.S. Army Joint<br>Base Lewis-McChord |                             |
| WA | Spokane | Fairchild Air<br>Force Base     | Military                                    | Yes, Fairchild Air Force<br>Base           |                             |
